# Supplementary material for: Targeting Small GTPases and Their Prenylation in Diabetes Mellitus
Source: PubMed Central journal article supplement (PMC8389838; doi:10.1021/acs.jmedchem.1c00410), 2021-07-08
Supplement: jm1c00410_si_001.pdf [file jm1c00410_si_001.pdf]

Supplementary Information

## Targeting small GTPases and their prenylation in diabetes mellitus

*Edyta Gendaszewska-Darmach*<sup>1\*</sup>, *Malgorzata A. Garstka*<sup>2\*</sup>, *Katarzyna M. Błażewska*<sup>3\*</sup>

<sup>1</sup>*Institute of Molecular and Industrial Biotechnology, Faculty of Biotechnology and Food Sciences, Lodz University of Technology, Stefanowskiego 4/10, 90-924 Lodz, Poland; [edyta.gendaszewska-darmach@p.lodz.pl](mailto:edyta.gendaszewska-darmach@p.lodz.pl)*

<sup>2</sup>*Core Research Laboratory, Department of Endocrinology, Department of Tumor and Immunology, Precision Medical Institute, Western China Science and Technology Innovation Port, School of Medicine, the Second Affiliated Hospital of Xi'an Jiaotong, DaMingGong, Jian Qiang Road, Wei Yang district, Xi'an 710016, China, [m.garstka@xjtu.edu.cn](mailto:m.garstka@xjtu.edu.cn)*

<sup>3</sup>*Institute of Organic Chemistry, Faculty of Chemistry Lodz University of Technology, Zeromskiego St. 116, 90-924 Lodz, Poland; [katarzyna.blazewska@p.lodz.pl](mailto:katarzyna.blazewska@p.lodz.pl)*

\*Co-corresponding Authors

### Content

- |                          |         |
|--------------------------|---------|
| 1. Supplementary Figure  | S2-S6   |
| 2. Supplementary Table 1 | S7-S10  |
| 3. Supplementary Table 2 | S11-S13 |

A

|        | 10         | 20         | 30         | 40         | 50         | 60         | 70         | 80         | 90          | 100        |             |             |        |       |
|--------|------------|------------|------------|------------|------------|------------|------------|------------|-------------|------------|-------------|-------------|--------|-------|
| Rab1a  | .....      | .....      | .....      | .....      | .....      | ..         | MSSMNPEY   | DYLFKLLLI  | G DSGVGKS   | CLL        | LRFADDTY- T | ESYIST      | IGVD   |       |
| Rab35  | .....      | .....      | .....      | .....      | .....      | ..         | MARDY      | DHLFKLLII  | G DSGVGKS   | SLL        | LRFADNTF- S | GSYITT      | IGVD   |       |
| Rab13  | .....      | .....      | .....      | .....      | .....      | ..         | MAKAY      | DHLFKLLLI  | G DSGVGKT   | CLI        | IRFAEDNF- N | NTYIST      | IGID   |       |
| Rab3a  | .....      | .....      | .....      | .....      | .....      | ..         | MASATDSRY  | GQKESSDQNF | DYMFKILII   | G NSSVGKT  | SFL         | FRYADDSF- T | PAFVST | TVGID |
| Rab3b  | .....      | .....      | .....      | .....      | .....      | ..         | MASVTDGKT  | GVKDASDQNF | DYMFKLLII   | G NSSVGKT  | SFL         | FRYADDTF- T | PAFVST | TVGID |
| Rab26  | MSRKKTPKSK | GASTPAASTL | PTANGARPAR | SGTALSGPDA | PPNGPLQPGR | PSLGGGVDFY | DVAFKVMLV  | G DSGVGKT  | CLL         | VRFKDGAFLA | GTFIST      | TVGID       |        |       |
| Rab37  | .....      | .....      | .....      | M          | WLMSEAHGAE | PVLLREAARP | FTQTLRLCVP | SGNSKVMLL  | G DTGVGKT   | CFL        | IQPKDGAFLS  | GTFIAT      | TVGID  |       |
| Rab8a  | .....      | .....      | .....      | .....      | .....      | ..         | MAKTY      | DYLFKLLLI  | G DSGVGKT   | CVL        | FRFSEDAF- N | STFIST      | IGID   |       |
| Rab10  | .....      | .....      | .....      | .....      | .....      | ..         | MAKTY      | DLFLKLLLI  | G DSGVGKT   | CVL        | FRFSDDAF- N | TFFIST      | IGID   |       |
| Rab24  | .....      | .....      | .....      | .....      | .....      | ..         | MS- GQ     | RVDVKVVMLG | KEYVGKT     | SLV        | ERYVHDFLVL  | GPYQNT      | IGAA   |       |
| Rab7b  | .....      | .....      | .....      | .....      | .....      | ..         | MNPRK      | KVDLKLII   | V G AIGVGKT | SLL        | HQYVHKTF- Y | EEYQTL      | LGAS   |       |
| Rab18  | .....      | .....      | .....      | .....      | .....      | ..         | MDEDV      | LTTLKILII  | G ESGVGKS   | SLL        | LRFTDDTF- D | PELAAT      | IGVD   |       |
| Rab27a | .....      | .....      | .....      | .....      | .....      | ..         | MSDGDY     | DYLIKFLAL  | G DSGVGKT   | SVL        | YQYTDGKF- N | SKFIT       | TVGID  |       |
| Rab7a  | .....      | .....      | .....      | .....      | .....      | ..         | MTSRK      | KVLLKVIIL  | G DSGVGKT   | SLM        | NQYKAT      | IGAD        |        |       |
| Rab2a  | .....      | .....      | .....      | .....      | .....      | ..         | MAY        | AYLFKYIII  | G DTGVGKS   | CLL        | LQFTDKRF- Q | PVHDLT      | IGVE   |       |
| Rab4a  | .....      | .....      | .....      | .....      | .....      | ..         | MSQTAMSETY | DFLFKFLVI  | G NAGTGKS   | CLL        | HQFIEKKF- K | DDSNHT      | IGVE   |       |
| Rab11a | .....      | .....      | .....      | .....      | .....      | ..         | MGTR- DDEY | DYLFKVVLI  | G DSGVGKS   | NLL        | SRFTRNEF- N | LESKST      | IGVE   |       |
| Rab11b | .....      | .....      | .....      | .....      | .....      | ..         | MGTR- DDEY | DYLFKVVLI  | G DSGVGKS   | NLL        | SRFTRNEF- N | LESKST      | IGVE   |       |
| Rab14  | .....      | .....      | .....      | .....      | .....      | ..         | MATA- PNYN | SYIFKYIII  | G DMGVGKS   | CLL        | HQFTEKKF- M | ADCPHT      | IGVE   |       |
| Rab4b  | .....      | .....      | .....      | .....      | .....      | ..         | M- AETY    | DFLFKFLVI  | G SAGTGKS   | CLL        | HQFIEKKF- K | QDSNHT      | IGVE   |       |
| Rab28  | .....      | .....      | .....      | .....      | .....      | ..         | MSDS- EESQ | DRQLKIVVL  | G DGASGKT   | SLT        | TCFAQETF- G | KQYKQT      | IGLD   |       |

P loop

Switch I

G1

G2

Switch II

G3

|        | 110         | 120        | 130         | 140        | 150        | 160      | 170 | 180      | 190         | 200        |            |            |
|--------|-------------|------------|-------------|------------|------------|----------|-----|----------|-------------|------------|------------|------------|
| Rab1a  | FKIRTIELD-  | G          | K- TIKLQIW- | .....      | .....      | DT       | AGQ | ERFRITIT | SSYYRGAHGI  | IVVYDVTDQE | SFNNVKQWL- |            |
| Rab35  | FKIRTVEIN-  | G          | E- KVKLQIW- | .....      | .....      | DT       | AGQ | ERFRITIT | STYYRGTHGV  | IVVYDVTSAE | SFVNVKRWL- |            |
| Rab13  | FKIRTVDIE-  | G          | K- KIKLQVW- | .....      | .....      | DT       | AGQ | ERFKTIT  | TAYYRGAMGI  | ILVYDITDEK | SFENIQNWM- |            |
| Rab3a  | FKVKTIIYRN- | D          | K- RIKLQIW- | .....      | .....      | DT       | AGQ | ERYRTIT  | TAYYRGAMGF  | ILMYDITNEE | SFNAVQDWS- |            |
| Rab3b  | FKVKTIVYRH- | E          | K- RVKLQIW- | .....      | .....      | DT       | AGQ | ERYRTIT  | TAYYRGAMGF  | ILMYDITNEE | SFNAVQDWA- |            |
| Rab26  | FRNKVLDVD-  | G          | V- KVKLQMW- | .....      | .....      | DT       | AGQ | ERFRSVT  | HAYYRDAHAL  | LLLYDVTNKA | SFDNIQAWL- |            |
| Rab37  | FRNKVVTVD-  | G          | V- RVKLQIW- | .....      | .....      | DT       | AGQ | ERFRSVT  | HAYYRDAQAL  | LLLYDITNKS | SFDNIRAWL- |            |
| Rab8a  | FKIRTIELD-  | G          | K- RIKLQIW- | .....      | .....      | DT       | AGQ | ERFRITIT | TAYYRGAMGI  | MLVYDITNEK | SFDNIRNWI- |            |
| Rab10  | FKIKTVELQ-  | G          | K- KIKLQIW- | .....      | .....      | DT       | AGQ | ERFHTIT  | TSYYRGAMGI  | MLVYDITNGK | SFENISKWL- |            |
| Rab24  | FVAKVMSVG-  | D          | R- TVTLGIW- | .....      | .....      | DT       | AGS | ERYEAMS  | RIYYRGAKAA  | IVCYDLTDSS | SFERAKFWV- |            |
| Rab7b  | ILSKIIILG-  | D          | T- TLKLQIW- | .....      | .....      | DT       | GGQ | ERFRSMV  | STFYKGS DGC | ILAFDVTDL  | SFEALDIWR- |            |
| Rab18  | FKVKTISVD-  | G          | N- KAKLAIWV | TLHQQTANFF | LKSQIGNSPI | LKWAMWQY | DT  | AGQ      | ERFRSLT     | PSYYRGAQGV | ILVYDVTRRD | TFVKLDNWL- |
| Rab27a | FREKRVVYRA  | SGPDGATGRG | Q- RIHLQLW- | .....      | .....      | DT       | AGQ | ERFRSLT  | TAFFRDAMGF  | LLFLDLTNEQ | SFLNVRNWI- |            |
| Rab7a  | FLTKEVMVD-  | D          | R- LVTMQIW- | .....      | .....      | DT       | AGQ | ERFQSLG  | VAFYRGADCC  | VLVFDVTPAN | TFKTLDSWR- |            |
| Rab2a  | FGARMITID-  | G          | K- QIKLQIW- | .....      | .....      | DT       | AGQ | ESFRSIT  | RSYYRGAAGA  | LLVYDITRRD | TFNHLTTWL- |            |
| Rab4a  | FGSKIINVG-  | G          | K- YVKLQIW- | .....      | .....      | DT       | AGQ | ERFRSVT  | RSYYRGAAGA  | LLVYDITSRE | TYNALTNWL- |            |
| Rab11a | FATRSIQVD-  | G          | K- TIKAQIW- | .....      | .....      | DT       | AGQ | ERYRAIT  | SAYYRGAVGA  | LLVYDIAKHL | TYENVERWL- |            |
| Rab11b | FATRSIQVD-  | G          | K- TIKAQIW- | .....      | .....      | DT       | AGQ | ERYRAIT  | SAYYRGAVGA  | LLVYDIAKHL | TYENVERWL- |            |
| Rab14  | FGTRIIIEVS- | G          | Q- KIKLQIW- | .....      | .....      | DT       | AGQ | ERFRAVT  | RSYYRGAAGA  | LMVYDITRRS | TYNHLSSWL- |            |
| Rab4b  | FGSRVVNVG-  | G          | K- TVKLQIW- | .....      | .....      | DT       | AGQ | ERFRSVT  | RSYYRGAAGA  | LLVYDITSRE | TYNSLAAWL- |            |
| Rab28  | FFLRRITLP-  | G          | NLNVTLQIW-  | .....      | .....      | DI       | GGQ | TIGGKML  | DKYIYGAQGV  | LLVYDITNYQ | SFENLEDWYT |            |







**Supplementary Figure 1 corresponding to Figure 1.** Amino acid sequence alignment of human GTPases involved in diabetes and insulin resistance

Protein sequences were downloaded from String: functional proteins association network. Alignment of Rab (A), Rho (B) and Ras (C) proteins was performed using Praline (developed in the Centre for Integrative Bioinformatics Vrije Universiteit Amsterdam). Important regions are indicated: the P loop (orange), switch I (green) and switch II (magenta), the nucleotide-binding G-motifs (yellow, G1-G5) and the C-terminal cysteine important for prenylation (cyan). Numbers at the top indicate the residue number.

**Supplementary Table 1 corresponding to Figure 1.** List of crystal structures of small GTPases playing a role in diabetes.

| <b>GTPase</b>      | <b>GDP-bound</b>                 | <b>GTP&amp;-<br/>bound</b> | <b>In complex<br/>with effector</b> | <b>In complex with<br/>GEF</b> | <b>In complex<br/>with GAD</b> |
|--------------------|----------------------------------|----------------------------|-------------------------------------|--------------------------------|--------------------------------|
| <b>Rab GTPases</b> |                                  |                            |                                     |                                |                                |
| Rab1a              | 2FOL                             | ND                         | ND <sup>^</sup>                     | ND <sup>^</sup>                | ND <sup>^</sup>                |
| Rab2a              | ND                               | ND                         | ND                                  | ND                             | ND                             |
| Rab3a              | ND                               | 3RAB                       | ND                                  | ND                             | ND                             |
| Rab3b              | 3DZ8                             | ND                         | ND                                  | ND                             | ND                             |
| Rab4a              | 2BMD                             | 1YU9<br>2BME               | ND                                  | ND                             | ND                             |
| Rab4b              | 2O52                             | ND                         | ND                                  | ND                             | ND                             |
| Rab5a              | 1TU4<br>2BMD                     | 1N6H                       | ND <sup>^</sup>                     | ND <sup>^</sup>                | ND                             |
| Rab7               | <b>1VG1</b>                      | 1T91<br><b>1VG8</b>        | <b>1YHN (RILP)</b>                  | ND                             | ND                             |
| Rab8a              | 4LHV<br>6STF                     | 4LHW<br>6STG               | ND <sup>^</sup>                     | ND <sup>^</sup>                | ND <sup>^</sup>                |
| Rab10              | ND                               | ND                         | ND <sup>^</sup>                     | ND                             | ND                             |
| Rab11a             | 1OIV<br>1OIX (and<br>Pi)<br>6IY1 | 1OIW<br>1YZK               | ND <sup>^</sup>                     | ND <sup>^</sup>                | ND                             |

|                    |                      |                     |             |                                                               |     |
|--------------------|----------------------|---------------------|-------------|---------------------------------------------------------------|-----|
| Rab11b             | 2F9L                 | 2F9M                | ND^         | ND                                                            | ND  |
| Rab13              | ND                   | ND                  | ND          | ND                                                            | ND  |
| Rab14              | 1Z0F<br>4DRZ         | ND                  | ND^         | ND                                                            | ND  |
| Rab18              | ND                   | 1X3S                | ND          | ND                                                            | ND  |
| Rab24              | ND                   | ND                  | ND          | ND                                                            | ND  |
| Rab26              | ND                   | 2G6B                | ND          | ND                                                            | ND  |
| Rab27a             | ND                   | HUF6                | ND^         | ND                                                            | ND  |
| Rab28              | 2HXS                 | 3E5H                | ND          | ND                                                            | ND  |
| Rab35              | ND#                  | ND                  | ND^         | ND^                                                           | ND  |
| Rab37              | ND                   | ND                  | ND          | ND                                                            | ND  |
| <b>Rho GTPases</b> |                      |                     |             |                                                               |     |
| RhoA               | 1FTN<br>5E26<br>6KX2 | 1A2B<br>3TVD        | ND^         | ND^                                                           | ND  |
| Cdc42              | ND#                  | 2QR2                | 1CEE (WASP) | ND^                                                           | ND^ |
| Rac1               | 5N6O<br><b>6AGP</b>  | 1MH1<br><b>3TH5</b> | ND^         | 1FOE (TIAM1)<br><b>4YON (P-Rex1)</b><br>5O33 (Kalirin<br>DH1) | ND^ |

|                    |                                                                  |                                                                     |                                             |                                                                    |                          |
|--------------------|------------------------------------------------------------------|---------------------------------------------------------------------|---------------------------------------------|--------------------------------------------------------------------|--------------------------|
| TC10               | ND                                                               | 2ATX                                                                | 2KE4 (CDc42-interacting domain of CIP4)     | ND                                                                 | ND                       |
| RND3/<br>RhoE      | ND                                                               | 1GWN (only core domain)<br>1M7B                                     | ND^                                         | ND                                                                 | ND                       |
| <b>Ras GTPases</b> |                                                                  |                                                                     |                                             |                                                                    |                          |
| RalA               | 1U90<br>1U8Z<br>6P0O<br>6P0J                                     | ND                                                                  | 1UAD (Sec5)<br>1ZC3 (Exo84)<br>1ZC4 (Exo84) | ND                                                                 | ND                       |
| (R)Rad             | 2DPX<br>2GJS                                                     | 3Q72 (G domain)<br>3Q7P (G domain)                                  | ND                                          | ND                                                                 | ND                       |
| Rap1               | ND                                                               | ND                                                                  | ND^                                         | ND                                                                 | ND                       |
| H-Ras              | <u>1CRR</u><br><u>1CRQ</u><br><u>1CRP</u><br><b>2CLD</b><br>4Q21 | 121P<br>1CTQ<br>1PLK<br><b>1QRA</b><br>3TGP<br>4RSG<br>4EFL<br>5P21 | ND^                                         | 1NVX (SOS)<br>1NVW (SOS)<br>1NVU (SOS)<br>1BKD(SOS-1)<br>4URY(SOS) | <b>1WQ1<br/>(RasGAP)</b> |
| N-Ras              | ND                                                               | 5UHV                                                                | ND                                          | ND                                                                 | ND                       |

|       |                                      |                              |                 |    |    |
|-------|--------------------------------------|------------------------------|-----------------|----|----|
| K-Ras | 4OBE<br>5VQ8<br>5W22<br>6MBT<br>6MBU | 5VQ2<br>5VQ6<br>6GOD<br>6VC8 | ND <sup>^</sup> | ND | ND |
|-------|--------------------------------------|------------------------------|-----------------|----|----|

Structures identification codes (PDB ID codes) were assessed from the Protein Data Bank, <http://www.pdb.org>. As source organism taxonomy was selected *Homo sapiens*, *Mus musculus*, and *Rattus norvegicus*. X-ray and NMR structures are included. NMR structures are underlined. Only the structures of GTPases with a single Mg<sup>2+</sup> were included. Structures in the complex with the effectors unrelated to diabetes were omitted. ND - not determined for GTPases; ND<sup>^</sup> - there exist crystal structures of GTPase-effector/GEF/GAP complexes, but unrelated to diabetes, insulin resistance or insulin-dependent tissue; ND<sup>#</sup> - crystal structure of GDP-bound form exists only in the in complex with GEF; &GTP or its non-hydrolyzable analog, including GppNHp, GTPgammaS, GMP-PCP; PDB ID codes in bold represent structures used for the generation of Figure 1.

**Supplementary Table 2 corresponding to Figure 3.** List of crystal structures of the enzymes of mevalonate pathway playing a role in diabetes mellitus

| <b>Enzyme</b>                                                                | <b>Only enzyme</b>                                                               | <b>With substrate/product</b>                                                                                                                                                             | <b>With inhibitor</b>                                           |
|------------------------------------------------------------------------------|----------------------------------------------------------------------------------|-------------------------------------------------------------------------------------------------------------------------------------------------------------------------------------------|-----------------------------------------------------------------|
| HMG-CoA reductase                                                            | ND <sup>^</sup>                                                                  | 1DQ8 (HMG and CoA)<br><b>1DQ9 (HMG-CoA)</b><br>1DQA (HMG, CoA and NADP <sup>+</sup> )                                                                                                     | 1HW9 (Simvastatin)<br>1HWI (Fluvastatin)<br>1HWK (Artovastatin) |
| Farnesyl pyrophosphate synthase (FPPS)/ farnesyl diphosphate synthase (FDPS) | 1ZW5<br>2F7M<br>4XQR<br>4XQS (Mg <sup>2+</sup> )<br>4XQT<br>(3Mg <sup>2+</sup> ) | <b>5JA0 (FPP)</b>                                                                                                                                                                         | 2F89 (pamidronate)<br>2F8C (zoledronate)<br>2F92 (alendronate)  |
| Geranylgeranyl diphosphate synthase (GGPPS)                                  | ND <sup>^</sup>                                                                  | <b>2Q80 (GGPP)</b>                                                                                                                                                                        | ND <sup>^</sup>                                                 |
| Farnesyltransferase (FTase)                                                  | 1FT1                                                                             | <b>1FPP (FPP)</b><br>1FT2 (FPP, Zn <sup>2+</sup> )<br>1JC6 (FPP, TKCVFM peptide substrate)<br>1KZP (farnesylated K-Ras4b)<br>1TN8 (FPP, H-Ras)<br>2H6F (farnesylated DDPTASACVLS peptide) | 1SA4 (R115777)<br>1SA5 (BMS-214662)                             |

|                                                 |               |                                                                                                                                                                                                                                                                                                                                                 |     |
|-------------------------------------------------|---------------|-------------------------------------------------------------------------------------------------------------------------------------------------------------------------------------------------------------------------------------------------------------------------------------------------------------------------------------------------|-----|
| Geranylgeranyltransferase-I (GGTase-I)          | 1DCE          | <p><b>1N4P (GRG)</b></p> <p>1N4Q (GGPP*, geranylgeranylated KKKSKTKCVIL peptide)</p> <p>1N4R (geranylgeranylated KKKSKTKCVIL peptide)</p> <p>1N4S (GGPP, geranylgeranylated KKKSKTKCVIL peptide)</p> <p>1TNO (GGPP*, geranylgeranylated KKKSKTKCVIM peptide from K-Ras4b)</p> <p>1TNZ (GGPP*, geranylgeranylated RRCVLL peptide from Cdc42)</p> | ND^ |
| Geranylgeranyltransferase type-2 (GGTase-2)     | 3DSS          | <p><b>3DST (GRG)</b></p> <p>3DSU (FPP, Ca<sup>2+</sup>Zn<sup>2+</sup>)</p> <p>3DSV (monoprenylated SCSC peptide from Rab7)</p> <p>3DSW (monoprenylated SCSC peptide from Rab7)</p> <p>3DSX (diprenylated SCSC peptide from Rab7)</p>                                                                                                            | ND^ |
| Geranylgeranyltransferase type-III (GGTase-III) | <b>6J6X</b> & | ND^                                                                                                                                                                                                                                                                                                                                             | ND^ |

**Supplementary Table 2 corresponding to Figure 3.** List of crystal structures of the enzymes of mevalonate pathway playing a role in diabetes mellitus.

Structures identification codes (PDB ID codes) were assessed from the Protein Data Bank, <http://www.pdb.org>. As source organism taxonomy was selected *Homo sapiens*, *Mus musculus*, and *Rattus norvegicus*. Structures in the complex with the inhibitors unrelated to diabetes were omitted. ND - not determined for the enzymes, ND^ - there exist crystal structures of enzyme/substrate/product or

enzyme-inhibitor complexes, but unrelated to diabetes, insulin resistance or insulin-dependent tissue, \*analog, & deposited, but unpublished. PDB ID codes in bold represent structures used for the generation of Figure 3.
